# Supplementary material
Source: Springer Nature journal article supplement (https://www.springermedizin.de/resource/supplementary/12889_2012_5212_MOESM5_ESM.pdf/9495550)

%

%

100

97.2

93.1

80.8

67.5

80

60

40

20

0

Free

Low (USD 1)

Medium (USD 5)

High (USD 10.5)

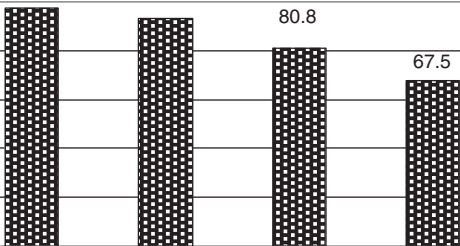

Supplement: MOESM5 [file 9495550]
